# Supplementary material
Source: PubMed Central journal article supplement (PMC7739927)
Supplement: rspb20202219supp1.pdf [file rspb20202219supp1.pdf]

| Variable                                                              | Description                                                                                                               |
|-----------------------------------------------------------------------|---------------------------------------------------------------------------------------------------------------------------|
| $d_{ij}$                                                              | number of seeds per plant individual $i$ at site $j$                                                                      |
| $\lambda_{ij}$                                                        | fecundity of individual $i$ at site $j$                                                                                   |
| $w_{ij}$                                                              | individual $i$ germination outcome at site $j$                                                                            |
| $r_{ij}$                                                              | individual $i$ germination probability at size $j$                                                                        |
| $f$                                                                   | a suitable link function for regression (e.g., logit, probit, log)                                                        |
| $\mathbf{x}_j$                                                        | covariates (e.g., temperature, precipitation) at site $j$                                                                 |
| $\boldsymbol{\mu}_{ij}$                                               | individual $i$ phenotype at site $j$                                                                                      |
| $\mu_{jq}$                                                            | phenotypic process associated with site $j$ , individual $i$ , and trait $q$                                              |
| $\gamma_r$                                                            | regression coefficients for the static, dynamic, and phenotypic aspects of the ecological component involving germination |
| $\gamma_\lambda$                                                      | regression coefficients for the static, dynamic, and phenotypic aspects of the ecological component involving fecundity   |
| $\boldsymbol{\alpha}, \boldsymbol{\alpha}_\mu, \boldsymbol{\alpha}_h$ | regression coefficients for the phenotypic model component                                                                |
| $\boldsymbol{\beta}_l$                                                | regression coefficients for the static, dynamic, and genetic aspects of the genetic model component                       |
| $\boldsymbol{\Sigma}_y$                                               | phenotypic covariance that can account for similarity among individuals and/or sites                                      |
| $\sigma_q^2$                                                          | unstructured phenotypic variance for trait $q$                                                                            |
| $p_{jq}$                                                              | phenotypic data associated with site $j$ , individual $i$ , and trait $q$                                                 |
| $\mathbf{g}_{ji}$                                                     | aggregated genetic data associated with site $j$ and individual $i$                                                       |
| $g_{jil}$                                                             | genetic data associated with site $j$ for individual $i$ at locus $l$ (e.g., minor allele frequencies)                    |
| $\sigma_g^2$                                                          | spatial variance term associated with gene flow                                                                           |

Table 1: Description of variables in hierarchical model.

| Index | Description      |
|-------|------------------|
| $i$   | individual $i$   |
| $j$   | site $j$         |
| $q$   | trait $q$        |
| $l$   | locus or SNP $l$ |

Table 2: Description of indices for variables in hierarchical model.
